# Supplementary material for: Genetic Variants Associated with Elevated Plasma Ceramides in Individuals with Metabolic Syndrome
Source: MDPI journal article supplement (doi:10.3390/genes13081497), 2022-08-22
Supplement: s1 [file s1]

# Supplementary Files

*Communication*

## Genetic variants associated with elevated plasma ceramides in individuals with metabolic syndrome

Sanghoo Lee <sup>1,\*</sup>, Seol-A Kim <sup>1</sup>, Yejin Kim <sup>1</sup>, Juhoon Kim <sup>1</sup>, Gayeon Hong <sup>1</sup>, Jeonghoon Hong <sup>1</sup>, Kyeonghwan Choi <sup>2</sup>, Chun-Sick Eom <sup>2</sup>, Saeyun Baik <sup>3</sup>, Mi-Kyeong Lee <sup>4</sup> and Kyoung-Ryul Lee <sup>1,2,3,4,\*</sup>

<sup>1</sup> Center for Companion Biomarker, Seoul Clinical Laboratories Healthcare Inc., Yongin 16954, Gyeonggi-do, Korea

<sup>2</sup> Center for Health Check-Up, HANARO Medical Foundation, Seoul 03159, Korea

<sup>3</sup> Central Laboratory, Seoul Clinical Laboratories Healthcare Inc., Yongin 16954, Gyeonggi-do, Korea

<sup>4</sup> Department of MyGenome, Seoul Clinical Laboratories, Yongin 16954, Gyeonggi-do, Korea

\* Correspondence: sprout30@scllab.co.kr (S.L.); dkrlee@scllab.co.kr (K.-R.L.)

**Supplementary Table S1.** LD analysis of the SNPs located within *CERS3*, *CERS6*, *SGMS1*, and *SPTLC3* genes involved in sphingolipid biosynthesis in the HapMap CEU data. LD was represented by correlation coefficient ( $R^2$ ).

|               | <i>SGMS1</i> |            |            | <i>CERS6</i> |            | <i>CERS3</i> |           | <i>SPTLC3</i> |           |
|---------------|--------------|------------|------------|--------------|------------|--------------|-----------|---------------|-----------|
|               | rs10826014   | rs11006229 | rs12358192 | rs80165332   | rs75397325 | rs72759132   | rs4246316 | rs6109681     | rs3906631 |
| <i>SGMS1</i>  |              |            |            |              |            |              |           |               |           |
| rs10826014    | -            | 0.004      | 0.009      |              |            |              |           |               |           |
| rs11006229    | 0.004        | -          | 0.292      |              |            |              |           |               |           |
| rs12358192    | 0.009        | 0.292      | -          |              |            |              |           |               |           |
| <i>CERS6</i>  |              | -          |            |              |            |              |           |               |           |
| rs80165332    |              |            |            | -            | NA         |              |           |               |           |
| rs75397325    |              |            |            | NA           | -          |              |           |               |           |
| <i>CERS3</i>  |              |            | -          |              |            |              |           |               |           |
| rs72759132    |              |            |            |              |            | -            | 0.137     |               |           |
| rs4246316     |              |            |            |              |            | 0.137        | -         |               |           |
| <i>SPTLC3</i> |              |            |            |              |            |              |           |               |           |
| rs6109681     |              |            |            |              |            |              |           | -             | 0.191     |
| rs3906631     |              |            |            |              |            |              |           | 0.191         | -         |

NA: not calculated.

**Supplementary Table S2.** LD analysis of the SNPs located within *CERS3*, *CERS6*, *SGMS1*, and *SPTLC3* genes involved in sphingolipid biosynthesis in the HapMap CHB and JPT data. LD was represented by  $R^2$ .

|               | <i>SGMS1</i> |            |            | <i>CERS6</i> |            | <i>CERS3</i> |           | <i>SPTLC3</i> |           |
|---------------|--------------|------------|------------|--------------|------------|--------------|-----------|---------------|-----------|
|               | rs10826014   | rs11006229 | rs12358192 | rs80165332   | rs75397325 | rs72759132   | rs4246316 | rs6109681     | rs3906631 |
| <i>SGMS1</i>  |              |            |            |              |            |              |           |               |           |
| rs10826014    | -            | 0.036      | 0.008      |              |            |              |           |               |           |
| rs11006229    | 0.036        | -          | 0.685      |              |            |              |           |               |           |
| rs12358192    | 0.008        | 0.685      | -          |              |            |              |           |               |           |
| <i>CERS6</i>  |              |            |            |              |            |              |           |               |           |
| rs80165332    |              |            |            | -            | 0.001      |              |           |               |           |
| rs75397325    |              |            |            | 0.001        | -          |              |           |               |           |
| <i>CERS3</i>  |              |            |            |              |            |              |           |               |           |
| rs72759132    |              |            | -          |              |            | -            | 0.264     |               |           |
| rs4246316     |              |            |            |              |            | 0.264        | -         |               |           |
| <i>SPTLC3</i> |              |            |            |              |            |              |           |               |           |
| rs6109681     |              |            |            |              |            |              |           | -             | 0.490     |
| rs3906631     |              |            |            |              |            |              |           | 0.490         | -         |

NA: not calculated.
